# Supplementary material
Source: PubMed Central journal article supplement (PMC3404735)

Supplemental Figure 1

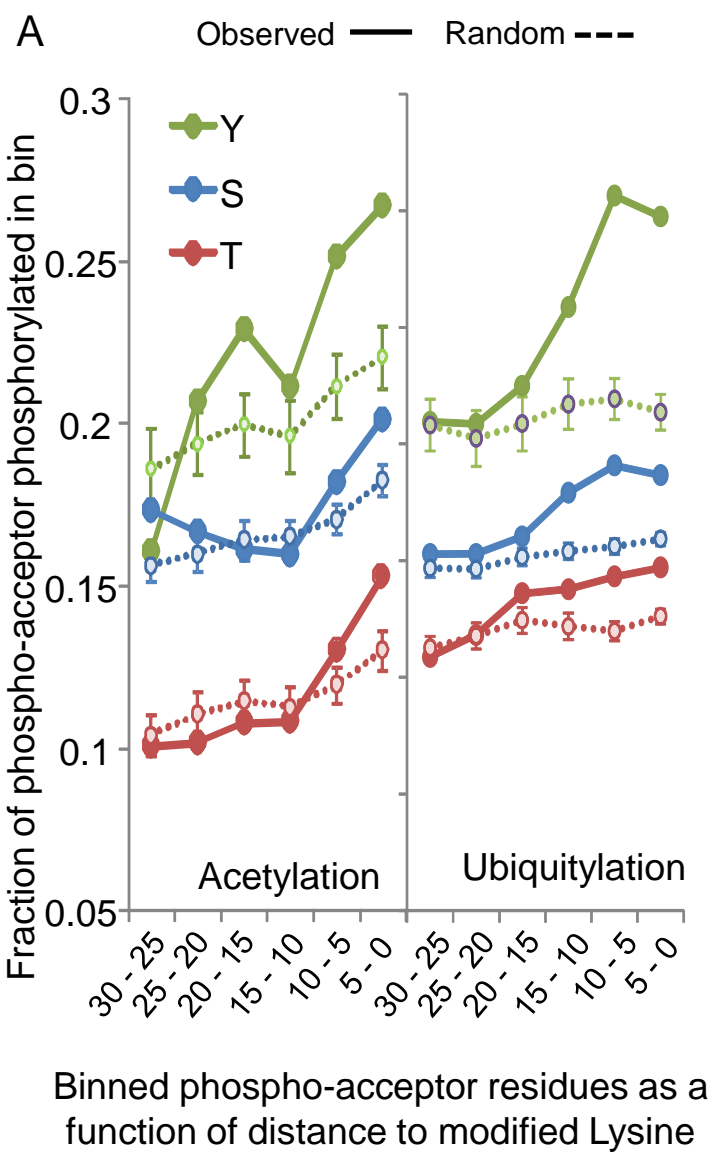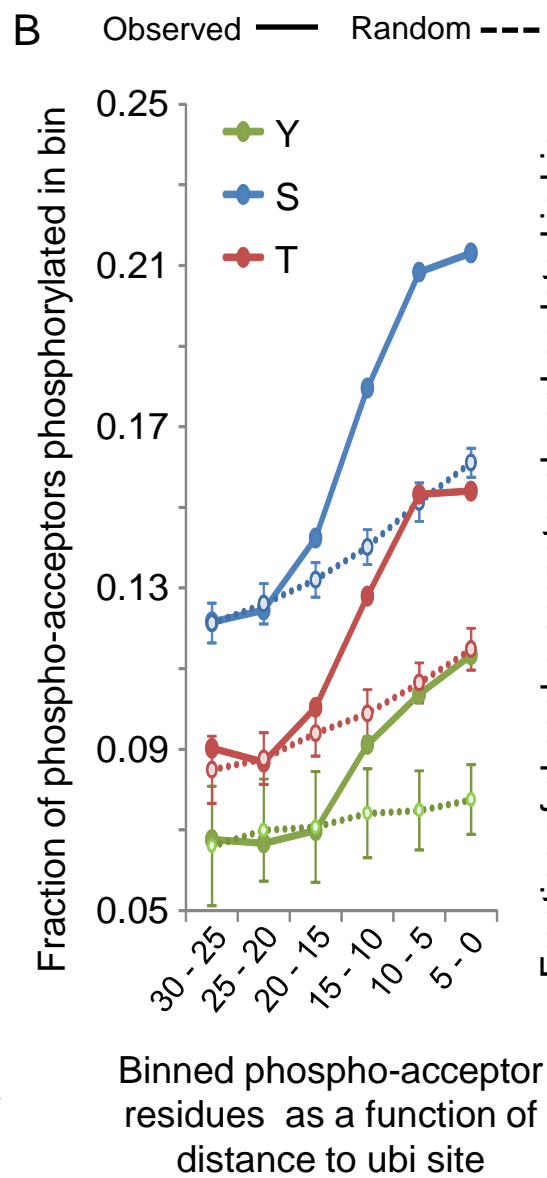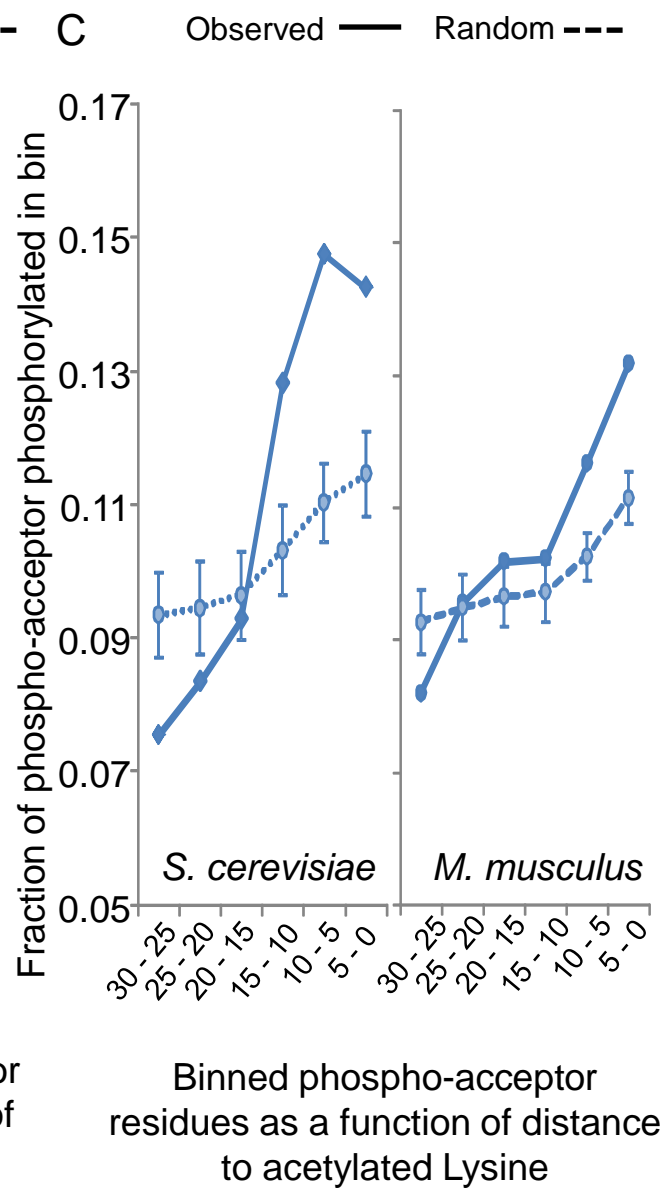

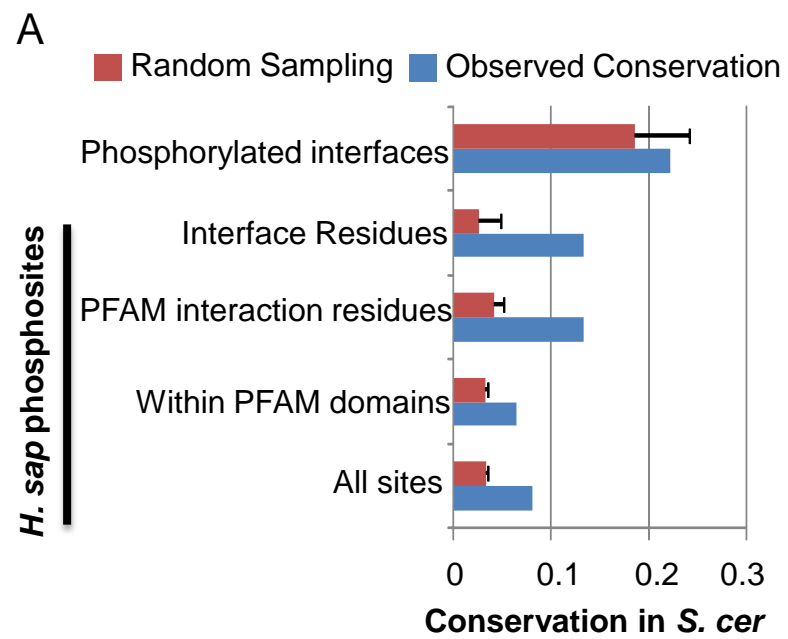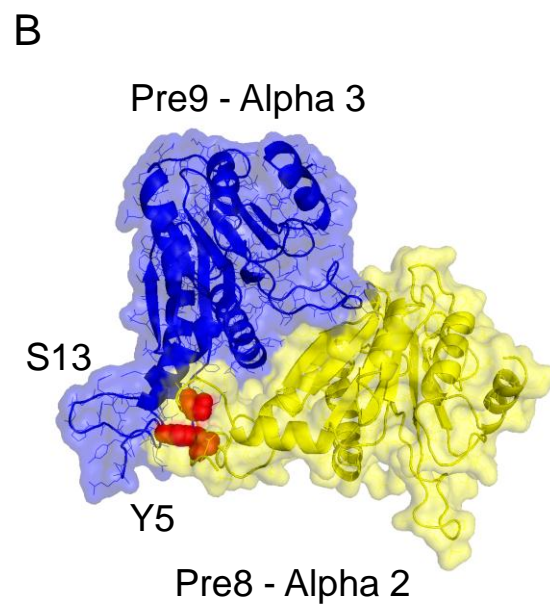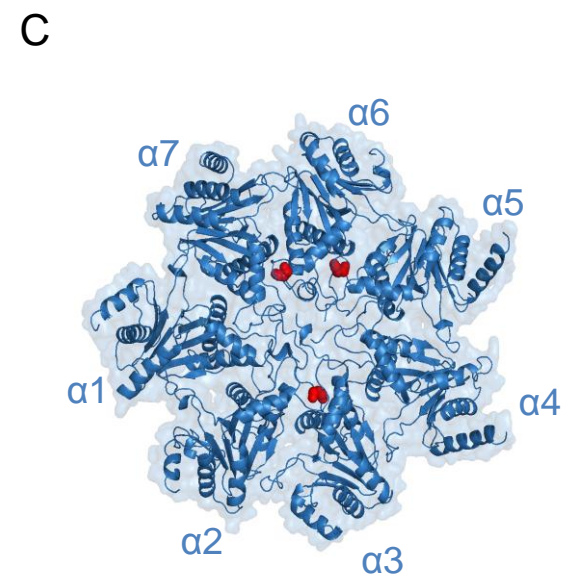

## RRM domain

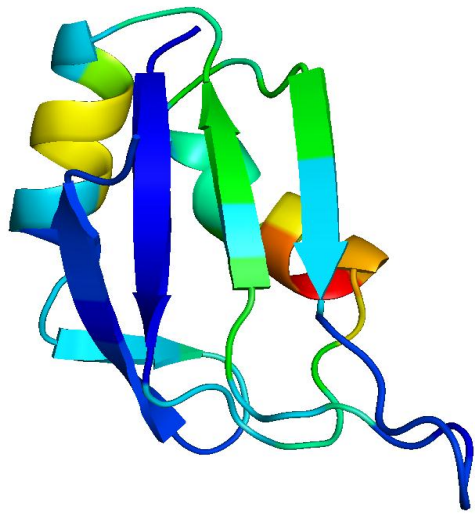

Enrichment  
over random

Low  
High

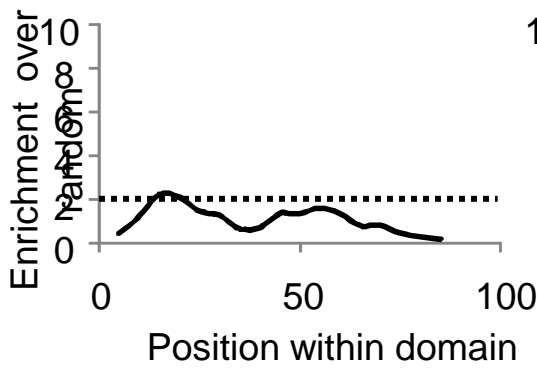

## PH domain

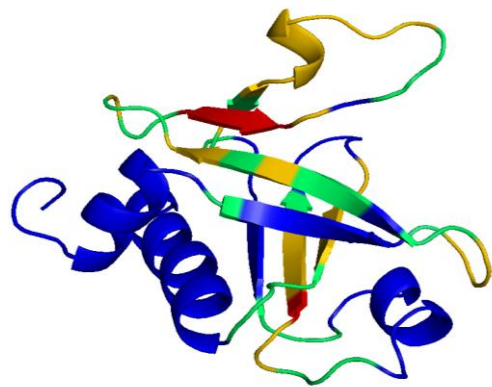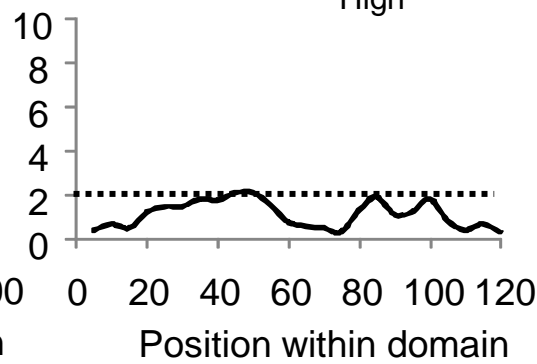

## Ras domain

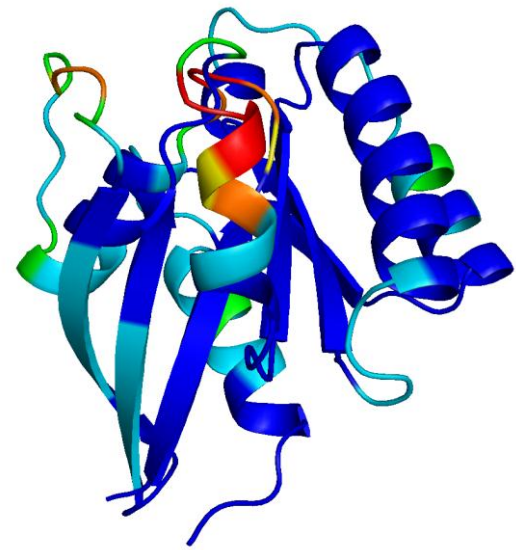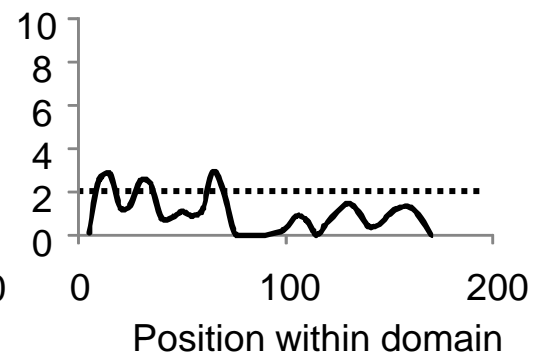

## UCH domain

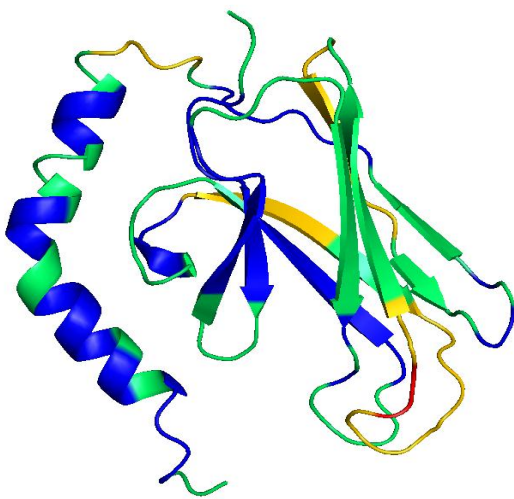

Enrichment  
over random

Low  
High

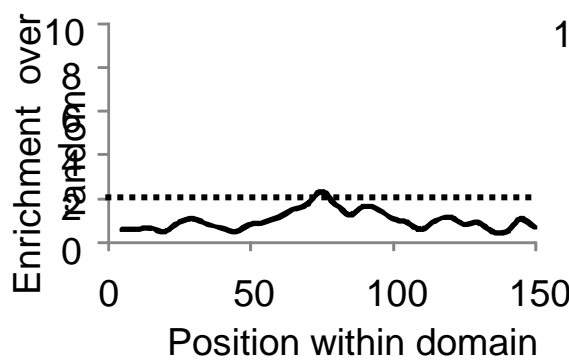

## MFS domain

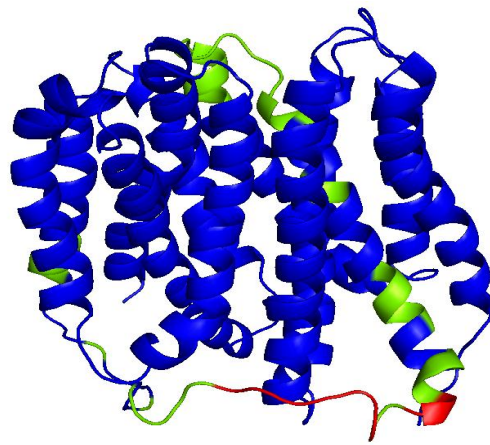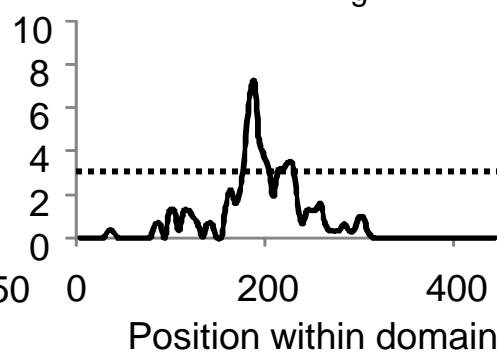

## Mitochondrial carrier

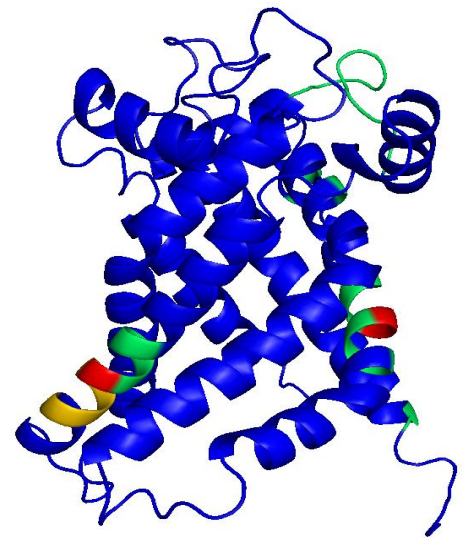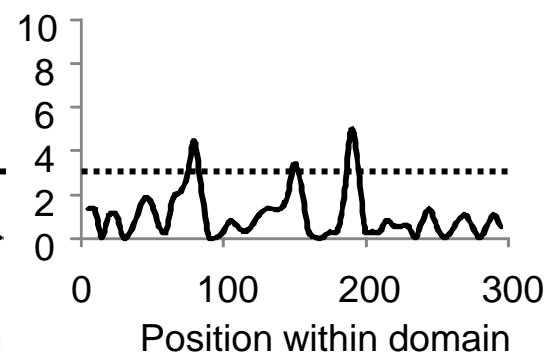

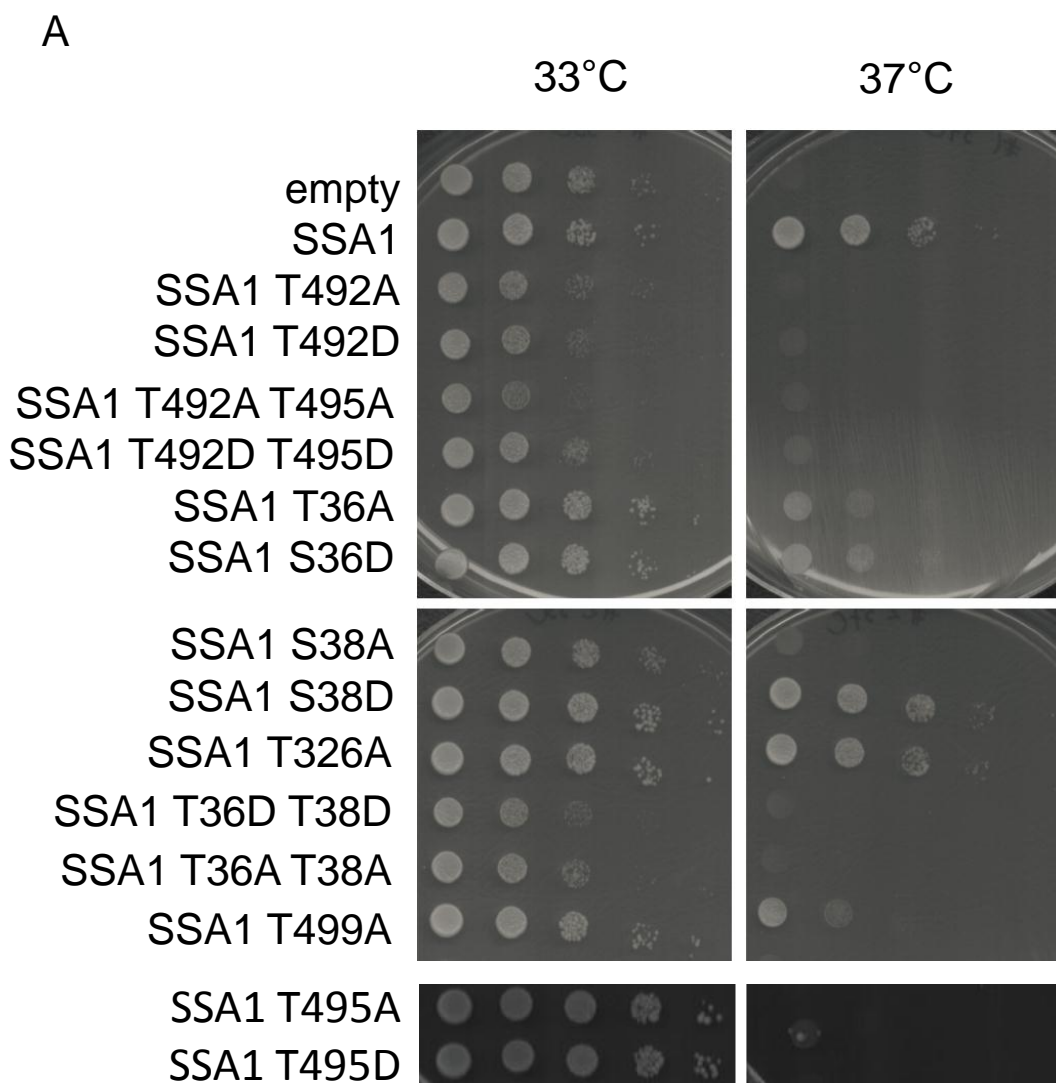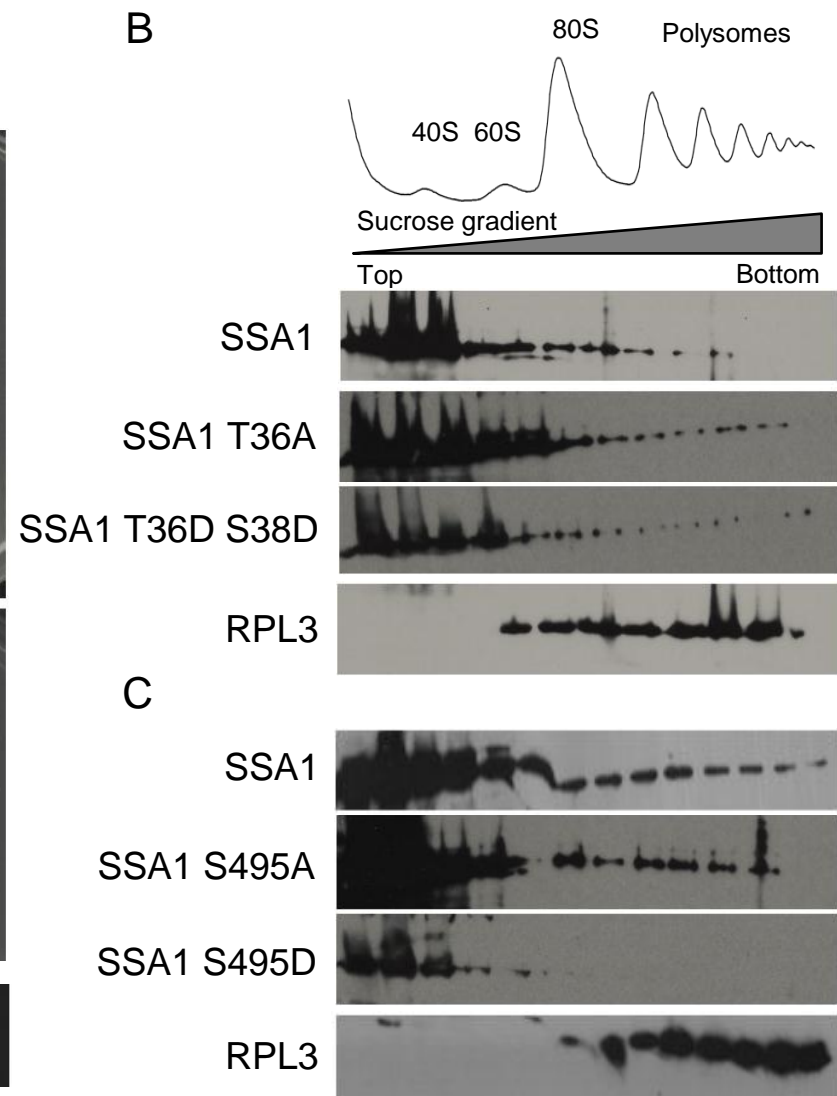

Supplement: NIHMS387394-supplement-02.pdf [file NIHMS387394-supplement-02.pdf]
